1 Title:

2 **Protein Kinase C and the stress response pathways are required for**  
3 **kinetochore homeostasis**

4

5 Running Title:

6 Pkc1 regulates the kinetochore.

7

8

9

10 Elena Ledesma-Fernández<sup>1,2</sup>, Eva Herrero<sup>1</sup>, Guðjón Ólafsson<sup>1</sup> & Peter H  
11 Thorpe<sup>1\*</sup>

12

13

14 1. The Francis Crick Institute, 1 Midland Road, London NW1 1AT

15

16

17 \* Corresponding author: P.H. Thorpe, Mitotic Control Laboratory, The Francis  
18 Crick Institute, 1 Midland Road, London NW1 1AT

19

Tel. +44 203 796 2403

20

E-mail [peter.thorpe@crick.ac.uk](mailto:peter.thorpe@crick.ac.uk)

21

22 2. Present address: MRC Laboratory for Molecular Cell Biology, University  
23 College London, London WC1 6BT

24

25

26 **Abstract**

27 Kinetochores serve both a structural role linking chromosomes to the mitotic  
28 spindle and a regulatory role, controlling the timing of mitosis via the spindle  
29 assembly checkpoint. To identify proteins that regulate the kinetochore we used  
30 a genome-wide fluorescence microscopy approach. We combined an array of  
31 mutants of either non-essential gene deletions or essential temperature-sensitive  
32 alleles with fluorescently tagged spindle pole bodies (centrosome) and outer  
33 kinetochores. Quantitative and qualitative analysis revealed mutants that affect  
34 the levels and distribution of kinetochores respectively. These mutants are  
35 enriched for those involved in mRNA processing, chromatin organization, DNA  
36 replication/repair and mitosis. Our data show that the Pkc1 kinase maintains the  
37 kinetochore focus via its ability to prevent cell stress and this phenotype is  
38 rescued by an osmotic stabilizer. These data support the notion that kinetochore  
39 and microtubule homeostasis are perturbed by the stress response pathways.  
40 Hence this observation provides a candidate mechanism for extracellular stress  
41 leading to chromosome segregation defects.

42

43

## 44 **Introduction**

45 Kinetochores are large mega-dalton complexes that assemble on chromosomes  
46 at the centromeres and direct chromosome segregation (Biggins, 2013;  
47 Cheeseman, 2014). Defects in chromosome segregation lead to aneuploidy, in  
48 which daughter cells have gained and/or lost whole chromosomes. Aneuploid  
49 cells are a hallmark of cancer tissue and aneuploidy may aid aspects of  
50 tumourigenesis or tumour evolution (de Bruin et al, 2014; Sotillo et al, 2007;  
51 Weaver et al, 2007). To prevent aneuploidy, cells carefully regulate the structure  
52 and function of their kinetochores to ensure accurate chromosome segregation.  
53 The budding yeast kinetochore provides perhaps the simplest model of a  
54 eukaryotic kinetochore, since it assembles on a single nucleosome of a short  
55 'point' centromere, yet many of the genes encoding yeast kinetochore proteins  
56 are well conserved with those of mammals. Despite the simplicity of the budding  
57 yeast kinetochore, it is a large complex, consisting of at least 60 different  
58 proteins, many present in multiple copies (Biggins, 2013; Westermann et al,  
59 2007). The first step in assembling kinetochores is the loading of a centromere  
60 specific variant of histone H3, Cse4, which then recruits the remaining  
61 kinetochore proteins (Collins et al, 2005). The key function of the fully assembled  
62 kinetochore is to link chromosomes to microtubules (MTs); this function is  
63 achieved primarily by the NDC80 complex (Cheeseman et al, 2006; DeLuca &  
64 Musacchio, 2012). The kinetochore's ability to maintain MT attachment is  
65 complicated by the dynamically extending and shrinking nature of the 'plus' end

66 of the MT. The heterodecameric DAM1-DASH complex is critical for this function  
67 and forms the most distal part of the kinetochore from the centromeric  
68 nucleosome (Joglekar et al, 2006; Shang et al, 2003). The DAM1-DASH complex  
69 requires the NDC80 complex for loading onto microtubules (Lampert et al, 2013;  
70 Maure et al, 2011). Sixteen DAM1-DASH decamers can encircle a MT *in vitro*,  
71 forming a ring (Gonen et al, 2012; Miranda et al, 2005; Ramey et al, 2011; Wang  
72 et al, 2007; Westermann et al, 2005). The genes encoding components of the  
73 DAM1-DASH complex are not conserved in mammalian cells, but the SKA  
74 complex appear to serve an analogous function, for example see (Jeyaprakash  
75 et al, 2012).

76 Although the constituents of the kinetochore are well characterized (Biggins,  
77 2013; Westermann et al, 2007), the proteins that regulate its function are less  
78 clearly defined. Key exceptions are the spindle assembly checkpoint (SAC) and  
79 the Aurora kinase B, which act by phosphorylating specific kinetochore proteins  
80 to delay anaphase or release microtubules respectively, for reviews see  
81 (Carmena et al, 2012; Jia et al, 2013; Musacchio & Salmon, 2007). There are  
82 multiple other examples of protein modifications affecting kinetochore function,  
83 for example methylation by Set1 (Zhang et al, 2005), ubiquitylation by Psh1  
84 (Hewawasam et al, 2010; Ranjitkar et al, 2010) or phosphorylation by the ATR  
85 orthologue, Mec1 (Strecker et al, 2016). However, we predict that other proteins  
86 that regulate kinetochores remain to be identified, based upon the large groups of  
87 proteins that have been found to affect the morphology of the mitotic spindle

88 (Vizeacoumar et al, 2010) and induce a chromosomal instability (CIN) phenotype  
89 (Stirling et al, 2011). In an attempt to identify novel regulators of the kinetochore,  
90 we performed a genome-wide screen of mutants of both non-essential and  
91 essential genes to detect changes in the levels and localization of the DAM1-  
92 DASH component, Dad4. Our analysis reveals a set of mutants that are enriched  
93 for those involved in chromosome segregation but also, DNA replication and  
94 repair, chromatin organization, mRNA processing and splicing. We were  
95 surprised to find a Dad4-YFP phenotype produced both by mutants that affect  
96 actin and the cell wall integrity pathway kinase, Pkc1. *PKC1* mutants produce a  
97 CIN phenotype (Stirling et al, 2011), therefore we examined their kinetochore  
98 phenotype in more detail. We find that *PKC1*'s effect upon the kinetochore likely  
99 acts via actin and MT stability, since the phenotype can be recapitulated with  
100 mutants or drugs that disrupt their function. This work establishes a mechanistic  
101 link between the stress response pathways and the kinetochore/mitotic spindle  
102 and suggests that stress plays an important role in kinetochore homeostasis.

103

## 104 **Results**

### 105 ***A screen for aberrant kinetochores***

106 To identify mutants that affect kinetochore function we created yeast strains  
107 encoding Dad4 fused to yellow fluorescent protein (Dad4-YFP) and Spc42 fused  
108 with red fluorescent protein (Spc42-RFP). Dad4 is a member of the outer  
109 kinetochore DAM1-DASH complex and Spc42 is a structural protein within the  
110 spindle pole body (SPB). Both of these fluorescently-tagged alleles are at their  
111 endogenous loci under the control of their native promoters. Fluorescence  
112 imaging shows stereotypical yeast kinetochore and SPB foci (Fig 1A). These  
113 yeast strains also contain haploid specific marker genes (*Tong & Boone, 2007*) to  
114 allow us to use the *Synthetic Genetic Array* (SGA) methodology (Tong et al,  
115 2001) to combine the two fluorescently-tagged proteins with arrays of mutants.  
116 We used SGA to combine the *DAD4-YFP* and *SPC42-RFP* alleles with the non-  
117 essential deletion collection (Winzeler et al, 1999), which includes 4746 separate  
118 viable deletion strains, to systematically assess the effect of specific mutations on  
119 the kinetochore (Fig 1B). The resulting haploid strains were imaged on agar pads  
120 using wide-field epi-flourescence microscopy. We included 1302 copies of a  
121 control strain to assess variability of the assay (a deletion of the *HIS3* gene,  
122 which is also absent in the BY4742 genetic background of the other deletions  
123 strains). To examine the impact of essential genes on the kinetochore, we  
124 employed a collection of temperature-sensitive (ts) alleles (Li et al, 2011) (1334  
125 members, include 754 unique alleles of 475 unique ORFs). These strains were

126 also combined with the fluorescence alleles using SGA and the resulting haploid  
127 strains were then grown for 5 hours at 37°C prior to imaging. Since we used a  
128 high numerical aperture objective lens (63x, 1.4NA), we were able to optically  
129 section through the yeast cells to produce 3-dimensional images (all of the image  
130 data from this screen is available via the Open Microscopy Environment, Image  
131 Data Repository, [idr-demo.openmicroscopy.org](http://idr-demo.openmicroscopy.org) with the accession identifier  
132 'idr0011'). These images were then analyzed using a fully automated image  
133 analysis protocol (Ledesma-Fernandez & Thorpe, 2015); we quantified the  
134 fluorescence intensity of each focus in each image. The fluorescence intensity is  
135 a measure of the local protein concentration at the kinetochore and has been  
136 widely used to measure kinetochore protein abundance (Joglekar et al, 2008;  
137 Joglekar et al, 2006).

138 The kinetochore intensities for all the strains analyzed shows a near-normal  
139 distribution and the yeast strains that differ most from the overall mean are  
140 enriched for mutants over controls (Fig 1C and Fig 1 source data). For the  
141 essential ts mutants we found a larger spread of Dad4-YFP fluorescence (Fig  
142 1D). In addition to the fully-automated quantitative analysis, we also manually  
143 examined all of the images to determine which did not have a standard  
144 stereotyped kinetochore localization of Dad4-YFP. Such a kinetochore phenotype  
145 would potentially be missed by quantitative measurements. We found 85 non-  
146 essential mutants that had such a phenotype (for examples see Fig 1E and Fig 1  
147 source data). Many of these (48 out of the 85) were already identified in our

148 quantitative screen, but 37 were missed with quantitative analysis. We did not  
149 include any of the essential ts mutants in this “visual foci phenotype” category  
150 since most strains that we examined would have scored as having aberrant  
151 kinetochores.

152 We retested 338 non-essential mutant strains that included the most extreme  
153 variants in Dad4-YFP intensity (high and low) and strains with a visual  
154 kinetochore phenotype, 45 copies of the control strain and 146 strains that we  
155 chose to retest based upon either their annotations related to spindle function or  
156 established links with the other high/low-Dad4-YFP mutants. Of 224 non-  
157 essential mutants that produced a Dad4-YFP phenotype in the primary screen  
158 (high-intensity, low-intensity or visual) and that we were able to score in the  
159 secondary screen, 192 consistently gave a phenotype (86%, Fig 1 source data).

160 Additionally, we were unable to score 20 mutants in the secondary screen that  
161 produced a Dad4-YFP phenotype in the primary screen and, based upon the  
162 high validation rate, we include these in our final list of mutants affecting Dad4-  
163 YFP. Consequently, our screen identifies 175 non-essential deletion mutants that  
164 affect Dad4-YFP levels (72 that decrease Dad4-YFP foci intensity, 103 that  
165 increase intensity; Fig 1 source data) and 37 additional mutants that produce a  
166 visual phenotype. We retested essential temperature sensitive alleles that had  
167 Dad4-YFP levels  $<200$  relative units and  $> 400$  relative units. Strains that had  
168 aberrant Dad4-YFP levels in both the primary and retest screens were  
169 considered further (Fig 1 source data). 67 essential alleles decrease Dad4-YFP



170 foci intensity and 48 increase it. Interestingly, some of the alleles of the ts  
171 collection are present in multiple copies since they were acquired from different  
172 sources. We find that these alleles can sometimes differ with one giving high  
173 intensity Dad4-YFP foci and the other giving low intensity foci (referred to as “low,  
174 high” in Fig 1 source data). An example of this is the *cdc20-1* allele, which  
175 consistently gave both high and low intensity foci from different isolates. In total  
176 116 ts alleles gave a Dad4-YFP intensity phenotype, corresponding to 102  
177 separate open reading frames. We found that a large proportion (~27%) of the  
178 essential alleles affect Dad4-YFP levels (Fig 1D and Fig 1 source data), which  
179 contrasts with only ~3% of non-essential genes affecting Dad4-YFP levels. In  
180 total, therefore, we have identified 314 genes, whose mutants produce a Dad4-  
181 YFP phenotype (Fig 1 source data).

## 182 **Global analysis**

183 To examine these mutants collectively we asked which gene ontology terms are  
184 enriched using the GOrilla algorithm (<http://cbl-gorilla.cs.technion.ac.il/> (Eden et  
185 al, 2009)). This analysis revealed enrichment of categories predicted to impact  
186 kinetochore function such as *chromosome segregation* and *regulation of*  
187 *chromosome segregation* (enrichment  $p$  values  $4 \times 10^{-5}$  and  $5 \times 10^{-7}$ , respectively)  
188 We also found that enriched categories include terms that we had not anticipated  
189 Fig 1F e.g. *mRNA Processing*, *RNA helicase activity and splicing*. These include  
190 three key members of the nonsense-mediated mRNA decay (NMD) pathway  
191 (*NMD2*, *NAM7* and *UPF3*). In addition, we found enrichment categories involved

192 in *chromatin organization, DNA replication, transcription elongation* and the  
193 *nuclear pore* (Fig 1F). For example, we found six members of the mediator  
194 complex (*MED2, PGD1, ROX3, SRB2, SOH1* and *TAF14*), three members of the  
195 RSC chromatin-remodeling complex (*RSC1, RSC2* and *LDB7*) and three  
196 members of the SAGA complex (*NGG1, SGF29* and *SPT7*).

197 We expected CIN mutants would show significant variability in their kinetochore  
198 foci intensities from cell to cell since we have previously found this to be true in  
199 selected cases where the intensity of Dad4-YFP was increased, for example  
200 *hmo1Δ* and *mad1Δ* (Berry et al, 2016; Ledesma-Fernandez & Thorpe, 2015)  
201 both of which were identified in this screen. Consistent with this notion, we  
202 identified 98 of the 723 CIN genes (Stirling et al, 2011), an enrichment *p*-value of  
203  $10^{-14}$ . We also note that a number of mutants were identified in the  
204 threonine/serine biosynthetic pathway: *hom2Δ, hom3Δ, aat2Δ* and *thr1Δ* (Fig S1  
205 A, Fig 1 source data). For example, *hom2Δ* cells showed increased and highly  
206 variable levels of Dad-YFP at kinetochore focus (Fig S1 B, C and D). However,  
207 our media for both the SGA and microscopy does not contain serine or threonine.  
208 Supplementing the media with those amino acids rescued the kinetochore  
209 phenotype (Fig S1 B, C and D). Other notable complexes identified in this Dad4-  
210 YFP screen were members of the RSC and SWI/SNF chromatin remodeling  
211 complexes (Fig S2), the mitotic exit network (Fig 1E *dbf2Δ* and Fig 1 source  
212 data), microtubule associated proteins and the kinetochore (Fig S3). Mutants of  
213 kinetochore and associated genes gave diverse Dad4-YFP phenotypes, for

214 example *kre28Δ*, *ctf19Δ*, *bim1Δ*, *bik1Δ* and *slk19Δ* produced a Dad4-YFP signal  
215 stretching between the spindle poles (Fig 1E and Fig S3) consistent with  
216 microtubule localization. In contrast *ask1-2* and *spc34-ts* have elevated levels of  
217 Dad4-YFP in their kinetochore foci, whereas *dam1-5* and *duo1-2* reduce the  
218 levels of Dad4-YFP (Fig S3F). We also identified multiple components of the  
219 *Nonsense-Mediated mRNA decay* pathway (NMD) that serves to degrade RNA  
220 and regulate gene expression (He et al 1997). Several kinetochore RNAs have  
221 been shown to increase in NMD mutants (Dahlseid et al 19898, Kebaara et al  
222 2009). Deletion of the NMD genes *UPF3*, *NAM7* and *NMD2* all had high levels of  
223 Dad4-YFP with considerable variability (Fig S4).

224

## 225 **Protein Kinase C**

226 One of the 107 CIN mutants that affected Dad4-YFP was an allele of the *PKC1*  
227 gene, which encodes the only Protein Kinase C in budding yeast (Pkc1). Pkc1 is  
228 an essential kinase that functions in the Cell Wall Integrity (CWI) pathway in  
229 addition to multiple other roles throughout the cell (Levin, 2005; Levin et al,  
230 1990). Mammalian cells have multiple PKC isoforms, which also have diverse  
231 functions (Mellor & Parker, 1998). Mutations in yeast *PKC1* have a chromosomal  
232 instability phenotype (Stirling et al, 2011) despite Pkc1 localizing to the cell  
233 periphery and bud neck. Three *PKC1* temperature-sensitive mutant alleles were  
234 tested in the screen and we found the more severe the phenotype the lower the  
235 reported restrictive temperature for the allele (Fig 1 source data). We retested the

236 *pkc1-1* strain after 5 hours growth at either 23°C or 37°C. At the higher  
237 temperature we confirmed that many of the *pkc1-1* cells had lost their Dad4-YFP  
238 foci whereas Spc42-RFP foci was still present (Fig 2A and B). To confirm that the  
239 Dad4-YFP phenotype in *pkc1-1* cells was caused by a failure in Pkc1, we next  
240 added back a wild-type copy of the *PKC1* gene at the *URA3* locus and found that  
241 this was sufficient to rescue the Dad4-YFP foci phenotype in the *pkc1-1* strain at  
242 37°C (Fig 2C and D).

243 To confirm that the kinetochore phenotype seen in *pkc1-1* cells was not  
244 dependent upon high-temperature, we used an ‘auxin-induced degradation’ (AID)  
245 system (Morawska & Ulrich, 2013; Nishimura et al, 2009). This approach uses a  
246 short AID tag fused to Pkc1 and AID-specific E3 ubiquitin ligase (AFB2). The  
247 interaction between the AID domain and AFB2 is dependent upon the plant  
248 hormone auxin (indole-3-acetic acid). In a strain encoding Dad4-YFP and Spc42-  
249 RFP, we fused the endogenous *PKC1* gene with an AID tag (*PKC1-AID*) and  
250 integrated the *AFB2* gene at the *URA3* locus. We found that after addition of 500  
251  $\mu$ M auxin, Pkc1 is depleted (Fig 2E) and the proportion of cells without visible  
252 Dad4-YFP foci increased (Fig 2F and G). These data confirm that the kinetochore  
253 phenotype of the *pkc1-1* can be recapitulated by depletion of Pkc1. We noted that  
254 the *AFB2* gene was particularly unstable in this strain suggesting that Pkc1  
255 degradation is partially active even without auxin, a previously reported effect  
256 (Morawska & Ulrich, 2013). This notion is consistent with the small loss of Dad4-

257 YFP in cells without auxin (Fig 2G), but we note that the protein analysis  
258 suggests that most cells retain Pkc1 (Fig 2E).

259 A potential mechanism to explain the *pkc1-1* kinetochore phenotype is reduced  
260 expression of kinetochore genes or degradation of kinetochore proteins.

261 However, we confirmed that several kinetochore proteins (Dad4, Dad3 and Mtw1)  
262 are not degraded in *pkc1-1* cells at the restrictive temperature (Fig S5A)

263 Since disruption of Pkc1 has an effect on the Dad4 protein levels at the  
264 kinetochore, we asked whether this effect extended to other members of the  
265 DAM1-DASH complex and kinetochore or was specific to Dad4. We transferred  
266 the *pkc1-1::KANMX* allele into strains encoding Dad3-YFP, Mtw1-YFP or Ndc10-  
267 GFP representing kinetochore components in the outer DAM1-DASH, central and  
268 inner kinetochore complexes respectively (Fig 3A). Upon shifting to the higher  
269 temperature we found that, in each case, the proportion of cells with visible  
270 kinetochore foci decreased (Fig 3B, C and D). Thus, the effect of perturbing Pkc1  
271 is not specific to Dad4 or the DAM1-DASH complex, but extends to the inner  
272 kinetochore proteins. Thus, mutation of *PKC1* is sufficient to cause an aberrant  
273 kinetochore phenotype.

274 We noticed that in *pkc1-1* cells, small additional Dad4-YFP foci could be  
275 observed even at the lower temperature (Fig 2A and C). Also Dad4-YFP foci in  
276 the *pkc1-1 ura3-1::PKC1::URA3* strain do not appear entirely normal, with  
277 multiple foci in some cells (Fig 2C). This suggests that non-lethal disruption of  
278 Pkc1 is sufficient to perturb the kinetochore. In yeast all 16

279 centromeres/kinetochores cluster together to produce the distinctive kinetochore  
280 focus. The additional kinetochore foci lead us to ask whether the *pkc1-1*  
281 kinetochore phenotype is consistent with kinetochore de-clustering. To test this  
282 notion we monitored the Dad4-YFP phenotype over time after shifting *pkc1-1*  
283 cells to the non-permissive temperature. We find that the proportion of cells with  
284 Dad4-YFP foci decreases over time (Fig 3E). Furthermore, small disperse foci  
285 appear in cells at early time points, consistent with de-clustering of kinetochores  
286 after the shift to the non-permissive temperature (Fig 3F).

287 *PKC1* is an essential gene whose product functions downstream of Rho1 in the  
288 CWI pathway (Fig 4A) (Levin et al, 1990). *PKC1* mutants die due to osmotic  
289 stress and this lethality can be rescued by the addition of an osmotic stabilizer,  
290 such as 1 M sorbitol (Paravicini et al, 1992). To test whether the kinetochore  
291 phenotype was linked to a failure in CWI, we attempted to rescue the kinetochore  
292 phenotype of *pkc1-1* cells with sorbitol. *pkc1-1* cells were grown at 37°C for 5  
293 hours with or without sorbitol and Dad4-YFP signal assessed by microscopy. We  
294 found that 1 M sorbitol is sufficient to rescue the visible disappearance of Dad4  
295 foci (Fig 4B and C), however, the rescued cells had additional foci suggesting  
296 either non-kinetochore clusters of Dad4 or partially declustered centromeres.

297 These data suggest that osmotic stress contributes significantly to the Dad4-YFP  
298 phenotype. However, mutants of the other members of the CWI pathway (Rom2,  
299 Bck1, Mkk1, Mkk2 and Slk2) show no comparable Dad4-YFP phenotype with the  
300 exception of *slk2Δ* (Fig S5B). We asked whether the canonical stress response

301 pathway (Hog1, p38) is active in *pkc1-1* cells. Hog1 is the canonical mitogen-  
302 activated protein (MAP) kinase in yeast and is activated in response to stress  
303 (Brewster et al, 1993). We probed whole cell extracts from *pkc1-1* cells and find  
304 that Hog1 is phosphorylated consistent with an activated stress response  
305 pathway although both at the permissive and restrictive temperatures (Fig S5C).  
306 These data show that while the Dad4 phenotype of *pkc1-1* mutants is linked to  
307 stress, this is not entirely dependent upon the CWI MAP kinase cascade  
308 pathway.

309 Since sorbitol was able to partially rescue the Dad4 phenotype of *PKC1* mutants  
310 we looked for a connection between osmotic/cell wall stress and spindle biology.  
311 We noted that in the Dad4-YFP screen we identified a class of mutants related to  
312 actin dynamics (Fig 4D, Fig 1 source data). These include actin itself (e.g. *act1-*  
313 *101/105/121/133/136/159*), myosin (*myo2-16*), members of the Arp2/3 complex  
314 (e.g. *arp2-14*, *arp3-F306G*, *las17-13*) and others (Fig 1 source data). There is  
315 precedent for cytoskeletal defects leading to MT defects in fission yeast, where  
316 osmotic stress induces depolymerisation of the actin cytoskeleton and a  
317 perturbation in microtubule dynamics (Robertson & Hagan, 2008). Furthermore,  
318 mutants that affect the cell wall are important for MT stability (*LAS17*, *ECM27*,  
319 *SUR7*, *ECM33*, *ECM8*, *HLR1* and *KTR1*) (Vizeacoumar et al, 2010). If both *pkc1-*  
320 *1* and the actin mutants disrupt normal microtubule dynamics then we expected  
321 that a direct disruption of microtubule function would lead to a Dad4 phenotype.  
322 Indeed, we identified a number of MT associated proteins required for normal

323 Dad4-YFP levels or localization: Bim1, Bik1, Stu2, She1, Irc15, Rrd2 (Fig 1  
324 source data). To test this notion we used the microtubule destabilizing drug  
325 thiabendazole (TBZ) to examine the effects upon Dad4-YFP foci. After addition of  
326 increasing amounts of TBZ we saw an increase in cells lacking Dad4-YFP foci  
327 (Fig 4E and F). Interestingly, we noted that this phenotype is partially rescued by  
328 the addition of 1 M sorbitol, suggesting that sorbitol may do more than simply  
329 protect cells from osmotic shock (Fig 4E). These data highlight two points, first  
330 that disruption of MTs or MT dynamics could underlie Dad4 kinetochore  
331 phenotypes in the *pkc1-1* and actin mutants, and second that sorbitol may  
332 stabilize MTs – a notion supported by previous studies (Gerson-Gurwitz et al,  
333 2009; Korolyev et al, 2005).

### 334 **Synthetic Physical Interactions**

335 There is evidence that Pkc1 may act on nuclear proteins directly, since removal  
336 of a domain from the N-terminus of Pkc1 (HR1) leads to its localization to the  
337 mitotic spindle (Denis & Cyert, 2005). Furthermore, there are reported physical  
338 interactions between Pkc1 and the kinetochore proteins Nnf1, Nuf2 and Spc105  
339 (Wang et al, 2012). We did not detect Pkc1 at the kinetochore by fluorescence  
340 imaging of a Pkc1-GFP strain (Fig S5D) and Pkc1 has not been isolated with  
341 purified kinetochores (Akiyoshi et al, 2010; Ranjitkar et al, 2010). However, we  
342 wanted to ask whether forced recruitment of Pkc1 to the kinetochore would lead  
343 to a mitotic phenotype. To test this, we made use of the *Synthetic Physical*  
344 *Interaction* (SPI) system to separately associate Pkc1 with kinetochore and



345 associated proteins (Olafsson & Thorpe, 2015). The SPI system uses an  
346 antibody fragment that binds to GFP, the GFP-binding protein (GBP), which is  
347 fused to Pkc1, to bind to GFP-tagged proteins in the cell. The GBP includes an  
348 RFP tag to enable colocalization to be monitored by fluorescence imaging. We  
349 used plasmids encoding the GBP alone, Pkc1-GBP (wildtype Pkc1), *pkc1-ha*-  
350 GBP (a constitutively hyperactive mutant of Pkc1, *pkc1-R398A-R405A-K406A*  
351 (Martin et al, 2000) and *pkc1-kd*-GBP (a kinase dead version of Pkc1, *pkc1-*  
352 *K853R* (Watanabe et al, 1994)). These plasmids were separately transferred into  
353 159 GFP strains including kinetochore proteins, members of the CWI pathway  
354 and actin related proteins (Fig 5 source data). We confirmed that Pkc1-GBP was  
355 co-localizing with endogenously GFP-tagged kinetochore using fluorescence  
356 imaging. We found that the GFP-GBP binding is sufficient to cause considerable  
357 relocalization of Pkc1 to the kinetochore in all cases (Fig 5A), consistent with  
358 previous observations (Berry et al, 2016; Olafsson & Thorpe, 2015). We found  
359 that a number of haploid strains, which contain only a single endogenously  
360 encoded copy of the GFP tagged protein, are restricted, for growth when  
361 expressing Pkc1-GBP. The strongest SPI caused by Pkc1-GBP is with Bck1-GFP  
362 (Fig 5B, Fig 5 source data). Bck1 is the downstream target of Pkc1 in the CWI  
363 pathway (Fig 4A). In addition, association of Pkc1 with other MAP kinases further  
364 downstream in the CWI pathway also led to a growth defect (Mkk1, Mkk2 and  
365 Slit2) (Fig 5B, Fig 5 source data). From the kinetochore, we found that Ndc10,  
366 Cse4, Dad3, Dad4, Ctf19, Okp1, Cep3 all gave SPIs with Pkc1 (Fig 5B, C and

367 Fig 5 source data). Also, some SPB components such as Spc42 had SPIs with  
368 Pkc1 (Fig 5B, Fig 5 source data). To test whether these effects were specific for  
369 the kinase activity of Pkc1, we compared the growth defects caused by Pkc1-  
370 GBP, *pkc1-ha*-GBP and *pkc1-kd*-GBP. We found that downstream members of  
371 the CWI pathway are strongly sensitive to either Pkc1-GBP or *pkc1-ha*-GBP but  
372 not to *pkc1-kd*-GBP, except Bck1-GFP that is sensitive to all three Pkc1-GBP  
373 versions (Fig 5C). From the kinetochore proteins, Dad3 showed a strong growth  
374 defect with Pkc1-GBP or *pkc1-ha*-GBP but not to *pkc1-kd*-GBP (Fig 5C). It is  
375 possible that some of these SPIs are caused by mislocalization of the GFP-  
376 tagged protein (caused by association with the Pkc1-GBP). To address this we  
377 repeated the SPI screen in heterozygously GFP-tagged diploid strains. In these  
378 strains there is one allele of a gene linked to GFP and the other allele is not  
379 tagged. Thus, if the GFP-tagged protein is mislocalized, then the untagged  
380 version may be able to complement the defect. We compared again the growth  
381 defects caused by Pkc1-GBP, *pkc1-ha*-GBP and *pkc1-kd*-GBP in these  
382 heterozygous diploids (Fig 5D and E). We found that the only proteins that  
383 produce a SPI when comparing *pkc1-ha*-GBP with *pkc1-kd*-GBP are the four  
384 downstream MAP kinases in the CWI pathway: Bck1, Mkk1, Mkk2 and Slk2 (Fig  
385 5D and E). However, when comparing Pkc1-GBP with *pkc1-kd*-GBP, only the  
386 immediate downstream MAP kinase (Bck1) is a SPI (Fig 5D and E).  
387 Thus, although we cannot rule out a direct role for Pkc1 at the yeast kinetochore,  
388 we find that constitutive recruitment of Pkc1 to kinetochores does not result in a

389 mitotic phenotype consistent with an indirect role of Pkc1. This is further  
390 supported by the ability of sorbitol to rescue the *pkc1-1* kinetochore phenotype.  
391 These data suggest that *pkc1-1* mutants activate a stress response pathway that  
392 indirectly leads to the disassembly of the kinetochore cluster. Since previous  
393 work has demonstrated cell stress results in altered MT dynamics (Robertson &  
394 Hagan, 2008), we examined whether microtubules were affected by disruption of  
395 Pkc1. We used the Pkc1-AID inducible degron system in a strain that contains  
396 Dad4-YFP, Spc42-RFP and tubulin (Tub1) tagged at the N-terminus with  
397 mTurquoise (mTurq-Tub1, a fluorescent version of Tub1 that minimized the  
398 perturbation of MT function (Markus et al, 2015)). We induced Pkc1-AID  
399 degradation for 3 hours to identify cells as their kinetochore foci start to disperse.  
400 We find that a significant proportion of cells have altered kinetochore (Fig 6A)  
401 and that these cells have aberrant MTs (Fig 6B). The Pkc1 depleted cells appear  
402 to have hyperstable MTs compared with controls, and the extra-kinetochore foci  
403 are associated with these MTs (Fig 6B). Thus, these observations support the  
404 notion that the kinetochore phenotype seen in Pkc1 deficient cells is associated  
405 with altered MT stability. These data therefore provide a link between the stress  
406 response pathways and kinetochore function.

## 407 **Discussion**

408 We have performed a genome-wide screen to determine the pathways regulating  
409 the function of the outer kinetochore protein Dad4, part of the DAM1-DASH  
410 complex. This complex is an essential component of the outer kinetochore that

411 stabilizes the interaction between kinetochores and the dynamic ends of spindle  
412 MTs. The Dad4 screen revealed 315 ORFs that affect the levels and/or  
413 localization of this protein at the kinetochore foci. A significant proportion of these  
414 mutants also produce a CIN phenotype (Stirling et al, 2011) (enrichment  $p$ -value  
415 =  $5 \times 10^{-14}$ ) suggesting that they play a role in chromosome segregation. The  
416 mutants are also enriched for those that are sensitive to gamma irradiation,  
417 hydroxyurea and benomyl (enrichment  $p$ -values  $2 \times 10^{-14}$ ,  $9 \times 10^{-10}$  and  $7 \times 10^{-8}$   
418 respectively). Despite these enrichments, the mutants that perturb Dad4-YFP do  
419 not include classical DNA repair genes such as *RAD51* or *MRE11* but rather  
420 genes involved in mitosis and checkpoint function (there are some exceptions  
421 such as the nuclease gene *APN1*). The mutant list was also enriched for genes  
422 involved in RNA metabolism, transport, the nuclear pore and transcription (Fig  
423 1F).

424 We investigated the role of one particular mutant, *pkc1-1*, in more detail since  
425 this evolutionary conserved kinase is important for accurate chromosome  
426 segregation (Stirling et al, 2011), yet the Pkc1 kinase has no known role at the  
427 yeast kinetochore. We found that loss of Pkc1 led to kinetochore declustering and  
428 loss of kinetochore foci (Fig 2 and 3). Recently, a mitotic role for Protein Kinase  
429 epsilon (PKC $\epsilon$ ) has been discovered in mammalian cells (Brownlow et al, 2014;  
430 Saurin et al, 2008). PKC $\epsilon$  regulates the localization of SAC proteins,  
431 BubR1/Mad3 and Bub1 to kinetochores, and in its absence cells progress  
432 prematurely through mitosis. These data suggest a direct role for PKC $\epsilon$  at the

433 kinetochore. We were not able to detect Pkc1 at the kinetochore using  
434 fluorescent imaging (Fig 5SD), nor has Pkc1 been isolated with purified  
435 kinetochores (Akiyoshi et al, 2010; Ranjitkar et al, 2010). However, if Pkc1 were  
436 to act only transiently or through the action of a small number of molecules, then  
437 this would not be detected. To test whether Pkc1 has a direct effect at the  
438 kinetochore we used the *Synthetic Physical Interaction* system to forcibly  
439 associate Pkc1 to the kinetochore. Although we found that several kinetochore  
440 proteins do perturb growth when forcibly bound to Pkc1 (Fig 5C), these are likely  
441 due to disruption of the function of essential kinetochore proteins, since the  
442 phenotype is not present in heterozygously-tagged diploid cells, which include a  
443 non-bound form of the kinetochore protein (Fig 5 source data). However, we  
444 cannot rule out a direct role for Pkc1 mediated phosphorylation at the  
445 kinetochore, perhaps restricted to a specific point in the cell cycle.  
446 Since the kinetochore phenotype of *pkc1-1* cells was rescued by the addition of  
447 the osmo-protectant sorbitol, we suggest that cells in which Pkc1 is perturbed are  
448 activating stress response pathways that indirectly mediate the kinetochore  
449 phenotype. There is precedent for the stress response pathways altering MT  
450 dynamics (Robertson & Hagan, 2008) in fission yeast. The effect of osmotic  
451 stress was seen on filamentous actin and microtubules. Consistent with this, we  
452 find that MTs appear hyper-stabilized in budding yeast cells depleted of Pkc1 (Fig  
453 6). Thus, these data provide a rationale for the chromosomal instability  
454 phenotype seen in *PKC1* mutants. More broadly it may be anticipated that stress

455 response pathways could exert an effect on chromosome transmission via their  
456 action on the actin cytoskeleton and MTs. It will be interesting to decipher which  
457 stress response pathways contribute to the kinetochore phenotype and to  
458 determine whether kinetochore structure is controlled in part by microtubule  
459 dynamics. We see hyperactivation of the canonical Hog1 pathway, but since this  
460 is active in *pkc1-1* cells at the permissive temperature, there must be other  
461 contributing factors.

462

## 463 **Materials and Methods**

### 464 *Yeast Strains and Growth*

465 A full list of the yeast strains used in this study is provided in Table S1 and  
466 plasmids in Table S2. Yeast were manipulated using standard methods  
467 (Sherman, 2002); ts strains were grown at 23°C and then at non-permissive  
468 temperatures as indicated in the text.

### 469 *Synthetic Genetic Array (SGA)*

470 Strains encoding fluorescently tagged spindle components Dad4-YFP and  
471 Spc42-RFP (T34 and T37) were mated with an array of gene deletions (Winzeler  
472 et al, 1999) or ts alleles (Li et al, 2011) by combining the cells together on YPD  
473 plates using a Singer ROTOR pinning robot (Singer Instruments, UK). Diploids  
474 were then selected by two cycles of growth on rich media containing geneticin  
475 (G418), hygromycin (HYG) and nourseothricin (NAT). These diploids were  
476 sporulated for 2 weeks at 23°C on sporulation medium. The resulting spores were  
477 selected in four successive cycles of growth for 1 or 2 days at 30°C on synthetic  
478 media lacking leucine and lysine (1) with thialysine; (2) with thialysine and G418;  
479 (3) thialysine, G418 and NAT; and (4) thialysine, G418, NAT and HYG.

### 480 *Fluorescence imaging*

481 Cells were prepared for imaging by growth in liquid synthetic medium containing  
482 120 mg/litre adenine at 23°C for ~5 hours in 96 well plates. The cells were then  
483 collected by centrifugation and placed onto an 8x6 grid of agar pedestals (Werner  
484 et al, 2009). These 48 pad arrays were covered with a custom-sized 175 µm thick

485 coverslip and imaged on an upright epifluorescence microscope (Zeiss Axiovision  
486 Z2), using a 63x 1.4NA plan apochromat oil immersion lens. Zeiss Immersol  
487 518F immersion oil was used with a refractive index of 1.5181. Fluorescence  
488 illumination for the screen was provided by a 100W mercury bulb. Fluorescence  
489 filter cubes were as follows: YFP imaging used Zeiss filter set 46 (excitation BP  
490 500/20; dichroic FT 515, emission BP 535/30), RFP imaging used Zeiss filter set  
491 63HE (excitation BP 572/25; dichroic FT 590, emission BP 629/62), GFP imaging  
492 used Zeiss filter set 38HE (excitation BP 470/40; dichroic FT 495, emission BP  
493 525/50) and CFP imaging used Zeiss filter set 47HE (excitation BP 436/25;  
494 dichroic FT455, emission BP 480/40). Later experiments employed a Zeiss  
495 Colibri LED illumination system (445 nm for CFP excitation, 470 nm for GFP  
496 excitation, 505 nm for YFP excitation and 590nm for RFP excitation), with the  
497 filter cubes outlined above. A z stack of 21 images with a vertical separation of  
498 350 nm was acquired for each strain. Brightfield contrast was enhanced with  
499 differential interference contrast (DIC) prisms. The resulting light was captured  
500 using a Hamamatsu ORCA ER11 CCD camera with 6.45  $\mu\text{m}$  pixels, binned 2x2 or  
501 a Flash 4.0 Lte CMOS camera with 6.5  $\mu\text{m}$  pixels, binned 2x2 (Hamamatsu  
502 Photonics, Japan). The exposure times were set to ensure that pixels were not  
503 saturated, typically < 200 msec – for the genome-wide screen Dad4-YFP  
504 exposure times were 40 msec and Spc42-RFP 50 msec. Images shown in the  
505 figures were prepared using Volocity imaging software (Perkin Elmer Inc., USA).  
506 *Image analysis*



507 Qualitative image analysis was performed using Volocity to visualize the  
508 fluorescence images. Quantitative image analysis used an automated ImageJ  
509 script, FociQuant to quantify the kinetochore fluorescence signal (Ledesma-  
510 Fernandez & Thorpe, 2015). In brief, each kinetochore is identified automatically  
511 using the 'FindMaxima' function in ImageJ. The fluorescence intensity within a  
512 ~600 nm square box in the focal plane of each foci is measured and a local  
513 background signal for each focus is subtracted. We found that the deviations in  
514 fluorescence intensity of control strains across each 48 pad imaging plate and  
515 consequently we used a smoothing algorithm to normalize values across each  
516 plate of the screen (Olafsson & Thorpe, 2015).

#### 517 *Synthetic Physical Interactions*

518 We used the established method for synthetic physical interactions (Olafsson &  
519 Thorpe, 2015). In brief, The *GBP/PKC1-GBP* alleles were expressed from a  
520 single copy *CEN* plasmid under the control of a *CUP1* promoter, all strains were  
521 grown at 30°C. Plasmids encoding the GBP-tagged proteins and controls were  
522 separately transferred into the GFP strains using 'selective ploidy ablation' (SPA)  
523 (Reid et al, 2011). Arrays of 96 strains from the GFP collection were grown on  
524 rectangular plates containing YPD media, typically at 1536 colonies per plate  
525 density (16 replicates of each strain). After growth overnight, these *MATa* plates  
526 were copied onto new YPD plates with a lawn of donor *MATa* yeast strain  
527 containing a specific *LEU2* plasmid. The resulting diploids were grown overnight  
528 on YPD to allow mating. To select for haploid cells, these cells were then copied

529 onto media containing galactose and lacking leucine (GAL – leu) to compromise  
530 the conditional chromosomes of the donor strain, while selecting for the specific  
531 plasmid. 24 hours later the colonies were replicated to GAL –leu medium  
532 containing 5-fluoroorotic acid (GAL –leu 5FOA) to select against the remaining  
533 donor chromosomes. To select for diploids, after the YPD mating step, the  
534 colonies were copied onto media lacking histidine and leucine (-His, -Leu) to  
535 select for both the plasmid and the GFP in the recipient strain. After 24 hours the  
536 cells were copied onto fresh –His, -Leu plates. For both haploids and diploids the  
537 plates were imaged using a desktop scanner in transmission mode (minimum  
538 resolution 300 dpi) after 24-72 hours. Quantitative analysis of the resulting colony  
539 size was performed as previously reported. First, the colony sizes on each plate  
540 are normalized to a median value of 1 to account for plate to plate variations in  
541 growth. Next, for each strain, the average colony size of the control was  
542 compared with that of the experimental plasmid(s) to generate a growth ratio.  
543 The natural log of the growth ratios is reported here for each strain;  $LGR = \ln$   
544  $(\text{control size/experimental size})$ . An LGR of 0 indicates equal size colonies on  
545 experiment and control, whereas an LGR of 0.4 equates with an experimental  
546 colony 67% of the size of a control colony.

#### 547 *Protein extraction and Western Blot Analysis*

548 Whole cell extracts were prepared by using trichloroacetic acid (TCA) as  
549 previously described (Olafsson & Thorpe, 2015). Protein extracts were separated  
550 on acrylamide gels (7.5% for Pkc1 and 10% for Dad3, Dad4 and Mtw1). Then,

551 gels were transferred to 0.45  $\mu$ m supported nitrocellulose membrane (BIORAD).  
552 Membrane blocking and antibody incubation were performed using Western  
553 Blocking reagent (Roche) as recommended by manufacturer. Anti-FLAG antibody  
554 (Sigma, F7425) and anti-GFP antibody (Roche, 11814460001) were used at  
555 1:1000 dilutions. Anti-Pgk1 antibody (Invitrogen, 459250) was used at 1:10000.  
556 HRP conjugated anti-Rabbit IgG (Sigma, A0545) and anti-mouse IgG (Abcam,  
557 ab97265) were used at 1:100000 and 1:30000 dilution, respectively. Membranes  
558 were incubated for 1 min with Lumi-Light Western Blotting substrate (Roche)  
559 before film exposure.

560

561

## 562 **Acknowledgements**

563 We would like to thank Brenda Andrews, Lisa Berry, Erika Aquino, Helle Uhlich,  
564 Wei-Lih Lee, Iain Hagan, Peter Parker and Zemmer Gitai for materials,  
565 assistance and critical advice on this manuscript. This work was largely funded  
566 by the United Kingdom Medical Research Council (MRC) MC\_UP\_A252\_1027.  
567 This work was also supported by the Francis Crick Institute which receives its  
568 core funding from Cancer Research UK (FC001183), the UK Medical Research  
569 Council (FC001183), and the Wellcome Trust (FC001183). Our images are  
570 hosted by the Image Data Repository, which is funded by the BBSRC  
571 (BB/M018423/1).

572

573

574 **References**

- 575 Akiyoshi B, Sarangapani KK, Powers AF, Nelson CR, Reichow SL, Arellano-  
576 Santoyo H, Gonen T, Ranish JA, Asbury CL, Biggins S (2010) Tension directly  
577 stabilizes reconstituted kinetochore-microtubule attachments. *Nature* 468: 576-9
- 578 Berry LK, Olafsson G, Ledesma-Fernandez E, Thorpe PH (2016) Synthetic  
579 protein interactions reveal a functional map of the cell. *Elife* 5
- 580 Biggins S (2013) The composition, functions, and regulation of the budding yeast  
581 kinetochore. *Genetics* 194: 817-46
- 582 Brewster JL, de Valoir T, Dwyer ND, Winter E, Gustin MC (1993) An  
583 osmosensing signal transduction pathway in yeast. *Science* 259: 1760-3
- 584 Brownlow N, Pike T, Zicha D, Collinson L, Parker PJ (2014) Mitotic catenation is  
585 monitored and resolved by a PKCepsilon-regulated pathway. *Nat Commun* 5:  
586 5685
- 587 Carmena M, Wheelock M, Funabiki H, Earnshaw WC (2012) The chromosomal  
588 passenger complex (CPC): from easy rider to the godfather of mitosis. *Nat Rev*  
589 *Mol Cell Biol* 13: 789-803
- 590 Cheeseman IM (2014) The kinetochore. *Cold Spring Harb Perspect Biol* 6:  
591 a015826
- 592 Cheeseman IM, Chappie JS, Wilson-Kubalek EM, Desai A (2006) The conserved  
593 KMN network constitutes the core microtubule-binding site of the kinetochore.  
594 *Cell* 127: 983-97
- 595 Collins KA, Castillo AR, Tatsutani SY, Biggins S (2005) De novo kinetochore  
596 assembly requires the centromeric histone H3 variant. *Mol Biol Cell* 16: 5649-60
- 597 de Bruin EC, McGranahan N, Mitter R, Salm M, Wedge DC, Yates L, Jamal-  
598 Hanjani M, Shafi S, Murugaesu N, Rowan AJ, Gronroos E, Muhammad MA,  
599 Horswell S, Gerlinger M, Varela I, Jones D, Marshall J, Voet T, Van Loo P, Rasi  
600 DM et al. (2014) Spatial and temporal diversity in genomic instability processes  
601 defines lung cancer evolution. *Science* 346: 251-6
- 602 DeLuca JG, Musacchio A (2012) Structural organization of the kinetochore-  
603 microtubule interface. *Curr Opin Cell Biol* 24: 48-56
- 604 Denis V, Cyert MS (2005) Molecular analysis reveals localization of  
605 *Saccharomyces cerevisiae* protein kinase C to sites of polarized growth and  
606 Pkc1p targeting to the nucleus and mitotic spindle. *Eukaryot Cell* 4: 36-45

- 607 Eden E, Navon R, Steinfeld I, Lipson D, Yakhini Z (2009) GOrilla: a tool for  
608 discovery and visualization of enriched GO terms in ranked gene lists. *BMC*  
609 *Bioinformatics* 10: 48
- 610 Gerson-Gurwitz A, Movshovich N, Avunie R, Fridman V, Moyal K, Katz B, Hoyt  
611 MA, Gheber L (2009) Mid-anaphase arrest in *S. cerevisiae* cells eliminated for  
612 the function of Cin8 and dynein. *Cell Mol Life Sci* 66: 301-13
- 613 Gonen S, Akiyoshi B, Iadanza MG, Shi D, Duggan N, Biggins S, Gonen T (2012)  
614 The structure of purified kinetochores reveals multiple microtubule-attachment  
615 sites. *Nat Struct Mol Biol* 19: 925-9
- 616 Hewawasam G, Shivaraju M, Mattingly M, Venkatesh S, Martin-Brown S, Florens  
617 L, Workman JL, Gerton JL (2010) Psh1 is an E3 ubiquitin ligase that targets the  
618 centromeric histone variant Cse4. *Mol Cell* 40: 444-54
- 619 Jeyaprakash AA, Santamaria A, Jayachandran U, Chan YW, Benda C, Nigg EA,  
620 Conti E (2012) Structural and functional organization of the Ska complex, a key  
621 component of the kinetochore-microtubule interface. *Mol Cell* 46: 274-86
- 622 Jia L, Kim S, Yu H (2013) Tracking spindle checkpoint signals from kinetochores  
623 to APC/C. *Trends Biochem Sci* 38: 302-11
- 624 Joglekar AP, Bouck D, Finley K, Liu X, Wan Y, Berman J, He X, Salmon ED,  
625 Bloom KS (2008) Molecular architecture of the kinetochore-microtubule  
626 attachment site is conserved between point and regional centromeres. *J Cell Biol*  
627 181: 587-94
- 628 Joglekar AP, Bouck DC, Molk JN, Bloom KS, Salmon ED (2006) Molecular  
629 architecture of a kinetochore-microtubule attachment site. *Nat Cell Biol* 8: 581-5
- 630 Korolyev E, Steinberg-Neifach O, Eshel D (2005) Mutations in the yeast kinesin-  
631 like Cin8p are alleviated by osmotic support. *FEMS Microbiol Lett* 244: 379-83
- 632 Lampert F, Mieck C, Alushin GM, Nogales E, Westermann S (2013) Molecular  
633 requirements for the formation of a kinetochore-microtubule interface by Dam1  
634 and Ndc80 complexes. *J Cell Biol* 200: 21-30
- 635 Ledesma-Fernandez E, Thorpe PH (2015) Fluorescent foci quantitation for high-  
636 throughput analysis. *J Biol Methods* 2
- 637 Levin DE (2005) Cell wall integrity signaling in *Saccharomyces cerevisiae*.  
638 *Microbiol Mol Biol Rev* 69: 262-91

- 639 Levin DE, Fields FO, Kunisawa R, Bishop JM, Thorner J (1990) A candidate  
640 protein kinase C gene, PKC1, is required for the *S. cerevisiae* cell cycle. *Cell* 62:  
641 213-24
- 642 Li Z, Vizeacoumar FJ, Bahr S, Li J, Warringer J, Vizeacoumar FS, Min R,  
643 Vandersluis B, Bellay J, Devit M, Fleming JA, Stephens A, Haase J, Lin ZY,  
644 Baryshnikova A, Lu H, Yan Z, Jin K, Barker S, Datti A et al. (2011) Systematic  
645 exploration of essential yeast gene function with temperature-sensitive mutants.  
646 *Nat Biotechnol* 29: 361-7
- 647 Markus SM, Omer S, Baranowski K, Lee WL (2015) Improved Plasmids for  
648 Fluorescent Protein Tagging of Microtubules in *Saccharomyces cerevisiae*.  
649 *Traffic* 16: 773-86
- 650 Martin H, Rodriguez-Pachon JM, Ruiz C, Nombela C, Molina M (2000)  
651 Regulatory mechanisms for modulation of signaling through the cell integrity Sit2-  
652 mediated pathway in *Saccharomyces cerevisiae*. *J Biol Chem* 275: 1511-9
- 653 Maure JF, Komoto S, Oku Y, Mino A, Pasqualato S, Natsume K, Clayton L,  
654 Musacchio A, Tanaka TU (2011) The Ndc80 loop region facilitates formation of  
655 kinetochore attachment to the dynamic microtubule plus end. *Curr Biol* 21: 207-  
656 13
- 657 Mellor H, Parker PJ (1998) The extended protein kinase C superfamily. *Biochem*  
658 *J* 332 ( Pt 2): 281-92
- 659 Miranda JJ, De Wulf P, Sorger PK, Harrison SC (2005) The yeast DASH complex  
660 forms closed rings on microtubules. *Nat Struct Mol Biol* 12: 138-43
- 661 Morawska M, Ulrich HD (2013) An expanded tool kit for the auxin-inducible  
662 degron system in budding yeast. *Yeast* 30: 341-51
- 663 Musacchio A, Salmon ED (2007) The spindle-assembly checkpoint in space and  
664 time. *Nat Rev Mol Cell Biol* 8: 379-93
- 665 Nishimura K, Fukagawa T, Takisawa H, Kakimoto T, Kanemaki M (2009) An  
666 auxin-based degron system for the rapid depletion of proteins in nonplant cells.  
667 *Nat Methods* 6: 917-22
- 668 Olafsson G, Thorpe PH (2015) Synthetic physical interactions map kinetochore  
669 regulators and regions sensitive to constitutive Cdc14 localization. *Proc Natl*  
670 *Acad Sci U S A* 112: 10413-8
- 671 Paravicini G, Cooper M, Friedli L, Smith DJ, Carpentier JL, Klig LS, Payton MA  
672 (1992) The osmotic integrity of the yeast cell requires a functional PKC1 gene  
673 product. *Mol Cell Biol* 12: 4896-905

- 674 Ramey VH, Wong A, Fang J, Howes S, Barnes G, Nogales E (2011) Subunit  
675 organization in the Dam1 kinetochore complex and its ring around microtubules.  
676 *Mol Biol Cell* 22: 4335-42
- 677 Ranjitkar P, Press MO, Yi X, Baker R, MacCoss MJ, Biggins S (2010) An E3  
678 ubiquitin ligase prevents ectopic localization of the centromeric histone H3 variant  
679 via the centromere targeting domain. *Mol Cell* 40: 455-64
- 680 Reid RJ, Gonzalez-Barrera S, Sunjevaric I, Alvaro D, Ciccone S, Wagner M,  
681 Rothstein R (2011) Selective ploidy ablation, a high-throughput plasmid transfer  
682 protocol, identifies new genes affecting topoisomerase I-induced DNA damage.  
683 *Genome Res* 21: 477-86
- 684 Robertson AM, Hagan IM (2008) Stress-regulated kinase pathways in the  
685 recovery of tip growth and microtubule dynamics following osmotic stress in *S.*  
686 *pombe*. *J Cell Sci* 121: 4055-68
- 687 Saurin AT, Durgan J, Cameron AJ, Faisal A, Marber MS, Parker PJ (2008) The  
688 regulated assembly of a PKCepsilon complex controls the completion of  
689 cytokinesis. *Nat Cell Biol* 10: 891-901
- 690 Shang C, Hazbun TR, Cheeseman IM, Aranda J, Fields S, Drubin DG, Barnes G  
691 (2003) Kinetochore protein interactions and their regulation by the Aurora kinase  
692 Ipl1p. *Mol Biol Cell* 14: 3342-55
- 693 Sherman F (2002) Getting started with yeast. *Methods Enzymol* 350: 3-41
- 694 Sotillo R, Hernando E, Diaz-Rodriguez E, Teruya-Feldstein J, Cordon-Cardo C,  
695 Lowe SW, Benezra R (2007) Mad2 overexpression promotes aneuploidy and  
696 tumorigenesis in mice. *Cancer Cell* 11: 9-23
- 697 Stirling PC, Bloom MS, Solanki-Patil T, Smith S, Sipahimalani P, Li Z, Kofoed M,  
698 Ben-Aroya S, Myung K, Hieter P (2011) The complete spectrum of yeast  
699 chromosome instability genes identifies candidate CIN cancer genes and  
700 functional roles for ASTRA complex components. *PLoS Genet* 7: e1002057
- 701 Strecker J, Gupta GD, Zhang W, Bashkurov M, Landry MC, Pelletier L, Durocher  
702 D (2016) DNA damage signalling targets the kinetochore to promote chromatin  
703 mobility. *Nat Cell Biol* 18: 281-90
- 704 Tong AH, Evangelista M, Parsons AB, Xu H, Bader GD, Page N, Robinson M,  
705 Raghbizadeh S, Hogue CW, Bussey H, Andrews B, Tyers M, Boone C (2001)  
706 Systematic genetic analysis with ordered arrays of yeast deletion mutants.  
707 *Science* 294: 2364-8

- 708 Tong AHY, Boone C (2007) High-throughput strain construction and systematic  
709 synthetic lethal screening in *Saccharomyces cerevisiae*. *Yeast Gene Analysis*,  
710 *Second Edition* 36: 369-386
- 711 Vizeacoumar FJ, van Dyk N, F SV, Cheung V, Li J, Sydorsky Y, Case N, Li Z,  
712 Datti A, Nislow C, Raught B, Zhang Z, Frey B, Bloom K, Boone C, Andrews BJ  
713 (2010) Integrating high-throughput genetic interaction mapping and high-content  
714 screening to explore yeast spindle morphogenesis. *J Cell Biol* 188: 69-81
- 715 Wang HW, Ramey VH, Westermann S, Leschziner AE, Welburn JP, Nakajima Y,  
716 Drubin DG, Barnes G, Nogales E (2007) Architecture of the Dam1 kinetochore  
717 ring complex and implications for microtubule-driven assembly and force-  
718 coupling mechanisms. *Nat Struct Mol Biol* 14: 721-6
- 719 Wang Y, Zhang X, Zhang H, Lu Y, Huang H, Dong X, Chen J, Dong J, Yang X,  
720 Hang H, Jiang T (2012) Coiled-coil networking shapes cell molecular machinery.  
721 *Mol Biol Cell* 23: 3911-22
- 722 Watanabe M, Chen CY, Levin DE (1994) *Saccharomyces cerevisiae* PKC1  
723 encodes a protein kinase C (PKC) homolog with a substrate specificity similar to  
724 that of mammalian PKC. *J Biol Chem* 269: 16829-36
- 725 Weaver BA, Silk AD, Montagna C, Verdier-Pinard P, Cleveland DW (2007)  
726 Aneuploidy acts both oncogenically and as a tumor suppressor. *Cancer Cell* 11:  
727 25-36
- 728 Werner JN, Chen EY, Guberman JM, Zippilli AR, Irgon JJ, Gitai Z (2009)  
729 Quantitative genome-scale analysis of protein localization in an asymmetric  
730 bacterium. *Proc Natl Acad Sci U S A* 106: 7858-63
- 731 Westermann S, Avila-Sakar A, Wang HW, Niederstrasser H, Wong J, Drubin DG,  
732 Nogales E, Barnes G (2005) Formation of a dynamic kinetochore- microtubule  
733 interface through assembly of the Dam1 ring complex. *Mol Cell* 17: 277-90
- 734 Westermann S, Drubin DG, Barnes G (2007) Structures and functions of yeast  
735 kinetochore complexes. *Annu Rev Biochem* 76: 563-91
- 736 Winzeler EA, Shoemaker DD, Astromoff A, Liang H, Anderson K, Andre B,  
737 Bangham R, Benito R, Boeke JD, Bussey H, Chu AM, Connolly C, Davis K,  
738 Dietrich F, Dow SW, El Bakkoury M, Foury F, Friend SH, Gentalen E, Giaever G  
739 et al. (1999) Functional characterization of the *S. cerevisiae* genome by gene  
740 deletion and parallel analysis. *Science* 285: 901-6
- 741 Zhang K, Lin W, Latham JA, Riefler GM, Schumacher JM, Chan C, Tatchell K,  
742 Hawke DH, Kobayashi R, Dent SY (2005) The Set1 methyltransferase opposes  
743 Ipl1 aurora kinase functions in chromosome segregation. *Cell* 122: 723-34



744

## 745 **Figure Legends**

### 746 **Figure 1 – A genome-wide screen for mutants that disrupt the kinetochore**

747 **A** Endogenously-encoded Dad4-YFP and Spc42-RFP allow us to visualize

748 kinetochores and spindle pole bodies using fluorescence imaging at

749 different stages of the cell cycle; the scale bars are 5  $\mu$ m.

750 **B** The strategy for Synthetic Genetic Array (SGA) analysis is illustrated. The

751 haploid yeast strain encoding Dad4-YFP (green circle) and Spc42-RFP

752 (purple circle) is mated to an array of strains each of which contain a

753 specific mutation (blue circle). The resulting diploids are sporulated and the

754 haploid progeny containing both a mutation and two tagged genes is

755 selected.

756 **C** The plot shows the quantitation of the levels of Dad4-YFP in the non-

757 essential gene deletions from the lowest intensity (left) to the highest

758 intensity (right). Each point represents the mean fluorescent intensity of

759 kinetochore foci for each strain. Control (WT) strains are indicated in blue

760 and mutants in green. The box-and-whisker plot (inset) shows the

761 distribution of the data of both the controls and mutants. The box and

762 whiskers plots indicate the median (bar), quartiles (box) and 1.5 times the

763 interquartile range (whiskers), with outliers plotted as dots.

764 **D** The plot shows the quantitation of the levels of Dad4-YFP for the

765 temperature-sensitive (ts) strains plotted from the lowest intensity (left) to

766 the highest intensity (right). The box and whiskers plot (inset) shows the  
767 distribution of the fluorescence for the *ts* mutants, as for panel C.

768 E Four examples of mutants that produce a ‘visible’ Dad4-YFP phenotype are  
769 shown. *bik1Δ*, *slk19Δ*, *ngg1Δ* and *dbf2Δ* strains all have abnormal  
770 distribution of Dad4-YFP. The scale bars are 5  $\mu$ m.

771 F Gene Ontology enrichment analysis of the mutants that perturb Dad4-YFP  
772 levels or localization reveal categories of proteins that we had not  
773 anticipated to be related to kinetochore function. These included *mRNA*  
774 *processing* ( $p=3\times 10^{-13}$ ), *RNA splicing* ( $p=6\times 10^{-7}$ ) and *spliceosomal snRNP*  
775 *assembly* ( $p=5\times 10^{-4}$ ) (left panel). The mutants were also enriched for those  
776 involved in the *mitotic cell cycle* ( $p=4\times 10^{-14}$ ); including *DNA replication*  
777 ( $p=1\times 10^{-4}$ ), PolIII transcription elongation ( $p=7\times 10^{-5}$ ) and the *nuclear pore*  
778 ( $p=1\times 10^{-4}$ ) (right panel). Source data for this figure is available on the online  
779 supplementary information page.

780

## 781 **Figure 2 – Disruption of *PKC1* affects the level of Dad4-YFP**

782 A Dad4-YFP distribution in the *pkc1-1* strain. At 23°C, Dad4-YFP kinetochore  
783 foci are largely normal, except for a few additional weak foci in some cells  
784 (white arrowheads). Upon shifting to 37°C for 5 hours most *pkc1-1* cells  
785 have lost their Dad4-YFP foci. Scale bars are 5  $\mu$ m.

- 786 B The proportion of *pkc1-1* cells that have lost their Dad4-YFP foci is plotted  
787 after growth for 5 hours at either 23°C or 37°C. \*\*\* indicates a *p* value of  
788  $3 \times 10^{-25}$  from a Fishers exact test.
- 789 C The kinetochore phenotype caused by disrupting Pkc1 with the *pkc1-1*  
790 mutation at 37 °C is mitigated by the introduction of a wild-type copy of the  
791 *PKC1* gene at the *URA3* locus. Scale bars are 5  $\mu$ m.
- 792 D The proportion of *pkc1-1* and complemented *pkc1-1 PKC1* cells that have  
793 lost their Dad4-YFP foci is plotted after growth for 5 hours at either 23°C or  
794 37°C. \*\*\* indicates *p* values of less than  $10^{-40}$  from Fisher exact tests.
- 795 E Analysis of whole cell protein extracts show that Pkc1-AID protein is  
796 depleted from cells after addition of 500  $\mu$ M auxin. Phosphoglycerate kinase  
797 (Pgc1) is used as a loading control. Whole cell extract from cells  
798 overexpressing *PKC1-AID-FLAG* (first lane) and from cells with untagged  
799 *PKC1* (second lane) were used as positive and negative control,  
800 respectively.
- 801 F The Dad4-YFP phenotype of *pkc1-1* cells can be largely recapitulated by  
802 depleting Pkc1 after addition of auxin. Scale bars are 5  $\mu$ m.
- 803 G The proportion of PKC1-AID cells that have lost their Dad4-YFP foci after 3  
804 hours of treatment with 500  $\mu$ M auxin. \*\*\* indicates a *p* value of less than  
805  $10^{-50}$  from a Fishers exact test. We note that there may be some Pkc1-AID  
806 degradation without auxin, since some cells lose Dad4-YFP foci in the  
807 ethanol control.

808

809

810 **Figure 3 - Disruption of *PKC1* leads to kinetochore declustering**

811 **A** The schematic illustrates three additional fluorescently-tagged kinetochore  
812 proteins that were analyzed in *pkc1-1* cells. Ndc10 is a member of the CBF3  
813 inner kinetochore complex, Mtw1 is part of the central MIND complex and  
814 Dad3, like Dad4, is a member of the DAM1-DASH complex at the outer  
815 kinetochore.

816 **B** The proportions of *pkc1-1* cells that have lost Dad3-YFP or Mtw1-YFP  
817 kinetochore foci are plotted after growth for 5 hours at either 23°C or 37°C.  
818 \*\*\* indicates *p* values of less than  $10^{-40}$  from Fishers exact test.

819 **C** The proportions of *pkc1-1* cells that have lost their Ndc10-GFP foci are  
820 plotted after growth for 5 hours at either 23°C or 35°C. We note that in ~5%  
821 of the *pkc1-1* cells multiple Ndc10-GFP foci were observed at 35°C (orange  
822 category). \*\*\* indicates a *p* value of  $1 \times 10^{-30}$  from a Fishers exact test.

823 **D** Examples of *NDC10-GFP pkc1-1* cells at 23°C and 35°C are shown. In the  
824 lower panels we include a cell that shows the ‘multi-foci’ phenotype of  
825 Ndc10-GFP (black arrowheads); the scale bars are 5  $\mu$ m.

826 **E** The proportions of *pkc1-1* cells that have lost their Dad4-YFP foci after  
827 growth for varying times at 37°C are plotted. n.s. indicates not statistically  
828 significant and \*\*\* indicates *p* values of less than  $10^{-17}$  all using Fishers  
829 exact test.

830 F Prior to complete loss of the Dad4-YFP, we observed *pkc1-1* cells with  
831 weak extra Dad4-YFP foci (white arrowheads); the scale bars are 5  $\mu$ m,  
832 showing that the kinetochore foci subdivide after switching to the restrictive  
833 temperature.

834

#### 835 **Figure 4 – Cell stress affects kinetochore protein levels**

836 A Pkc1 is part of a MAP-kinase signaling cascade of the Cell Wall Integrity  
837 (CWI) pathway. Pkc1 is activated by Rho1 and acts directly upon Bck1.

838 B The Dad4-YFP phenotype observed in *pkc1-1* cells, after 5 hours of growth  
839 at 37°C, is largely rescued by addition of 1M sorbitol. Although, we noted  
840 that many *pkc1-1* cells in sorbitol had multiple Dad4-YFP foci (white  
841 arrowheads); scale bars are 5  $\mu$ m.

842 C The proportion of *pkc1-1* cells that have lost their Dad4-YFP foci are plotted  
843 after growth for varying times at 37°C with and without sorbitol. Nearly half  
844 of the *pkc1-1* cells in sorbitol have multiple Dad4-YFP foci. \*\*\* indicates a *p*  
845 value of  $4 \times 10^{-19}$  using Fishers exact test.

846 D Actin and microtubule (MT) mutants also cause a Dad4-YFP kinetochore  
847 phenotype (Fig 1 source data). The nodes of the interaction map depict  
848 genes whose mutants we identified to affect Dad4 levels or localization  
849 (light text) or genes not identified in the screen but related to CWI or  
850 kinetochore function (dark text). Genes are grouped and colour-coded

851 based upon their function. Genes are linked by genetic (green lines) and  
852 physical (red lines) interactions.

853 E The proportions of wild type (WT) cells that have lost their Dad4-YFP foci  
854 are plotted after growth with and without the microtubule-destabilizing drug  
855 thiabendazole (TBZ) and sorbitol. TBZ causes a proportion of cells to lose  
856 their Dad4 foci. At high concentration (100  $\mu\text{g/ml}$ ) TBZ produces a strong  
857 kinetochore phenotype that can be partially rescued with sorbitol. n.s.  
858 indicates not statistically significant ( $p=0.076$ ) and \*\*\* indicates  $p$  values  
859 less than  $10^{-15}$  all using Fishers exact test.

860 F An example of WT cells treated with 50  $\mu\text{g/ml}$  TBZ for 10 minutes is shown.  
861 The scale bars are 5  $\mu\text{m}$ .

862

### 863 **Figure 5 – Synthetic Physical Interactions with Pkc1**

864 A The GBP-tagged versions of Pkc1, *pkc1-kd* and *pkc1-ha*, all colocalize with  
865 kinetochore proteins as assessed by fluorescence imaging. Four examples  
866 are shown, Dad4-GFP, Dad3-GFP, Mtw1-GFP and Ctf19-GFP.

867 B Log growth ratio of GFP tagged strains expressing Pkc1-GBP versus  
868 expressing GBP. Pkc1-GBP was transformed into an array of 176 GFP-  
869 tagged haploid strains, encoding 159 different GFP proteins (17 strains  
870 were present in duplicate). The relative growth of the resulting strains was  
871 assessed to detect a mitotic phenotype. A positive ‘Log Growth Ratio’ (LGR)  
872 indicates a growth defect. The strongest growth defect was produced by the

873 association of Pkc1 with its kinase target, Bck1 (LGR=1.8). Associations of  
874 Pkc1 with several kinetochore proteins also produced growth defects Ndc10  
875 (LGR=1.4), Cse4 (LGR=1.3), Dad3 (LGR=1.2 & 0.9) and Dad4 (LGR=1.2).  
876 An LGR of 1 equates with a control colony 2.7 times as large as an  
877 experimental colony, LGRs greater than 0.4 are detectable by eye.

878 C Log growth ratio of GFP tagged strains expressing *PKC1-GBP*, *PKC1-KD-*  
879 *GBP* or *PKC1-HA-GBP* versus expressing *GBP* alone. GFP protein  
880 associations whose growth effect is specific to both the Pkc1-GBP and  
881 *pkc1-ha*-GBP are labeled in red (with bold text indicating a quantitatively  
882 stronger relative growth defect). GFP protein associations whose growth  
883 effect is specific to *pkc1-ha*-GBP are labeled in blue. GFP protein  
884 associations whose growth effect are not specific, but are greater with the  
885 Pkc1-GBP and/or *pkc1-ha*-GBP are labeled in yellow.

886 D Log Growth Ratio comparisons of diploid heterozygously GFP-tagged  
887 strains expressing either *PKC1-GBP*, *PKC1-KD-GBP* or *PKC1-HA-GBP*.  
888 When comparing Pkc1-GBP with *pkc1-kd*-GBP, the only growth defect was  
889 in Bck1, the direct target of Pkc1 (blue dots). When comparing *pkc1-ha-*  
890 *GBP* with *pkc1-kd*-GBP, the four kinases in the CWI pathway downstream  
891 of Pkc1 Bck1, Mkk1, Mkk2 and Slk2 (red dots) showed a growth defect.

892 E Examples of the strong growth defects produced by combining Pkc1-GBP  
893 *pkc1-kd*-GBP or *pkc1-ha*-GBP with GFP-tagged members of the CWI  
894 pathway are shown (See Fig 5 source data). Each strain is arrayed in 16

895 replicates. Source data for this figure is available on the online  
896 supplementary information page.

897

898 **Figure 6 – Pkc1 maintains normal microtubule morphology**

899 **A** Pkc1-AID was depleted in cells by addition of 500  $\mu$ M auxin. The cells were  
900 incubated for three hours to identify cells as their kinetochore foci sub-divide  
901 (black arrowheads within the inset panel). The proportion of cells with  
902 multiple Dad4-YFP foci is shown; \*\*\* indicates a  $p$  value of  $4 \times 10^{-14}$  using  
903 Fishers exact test, and error bars show 95% exact binomial confidence  
904 intervals.

905 **B** Cells that contain additional Dad4-YFP foci (white arrowheads) show  
906 colocalization of the Dad4-YFP foci with the microtubules, scale bars are 5  
907  $\mu$ m.

908

909



**Fig 1**

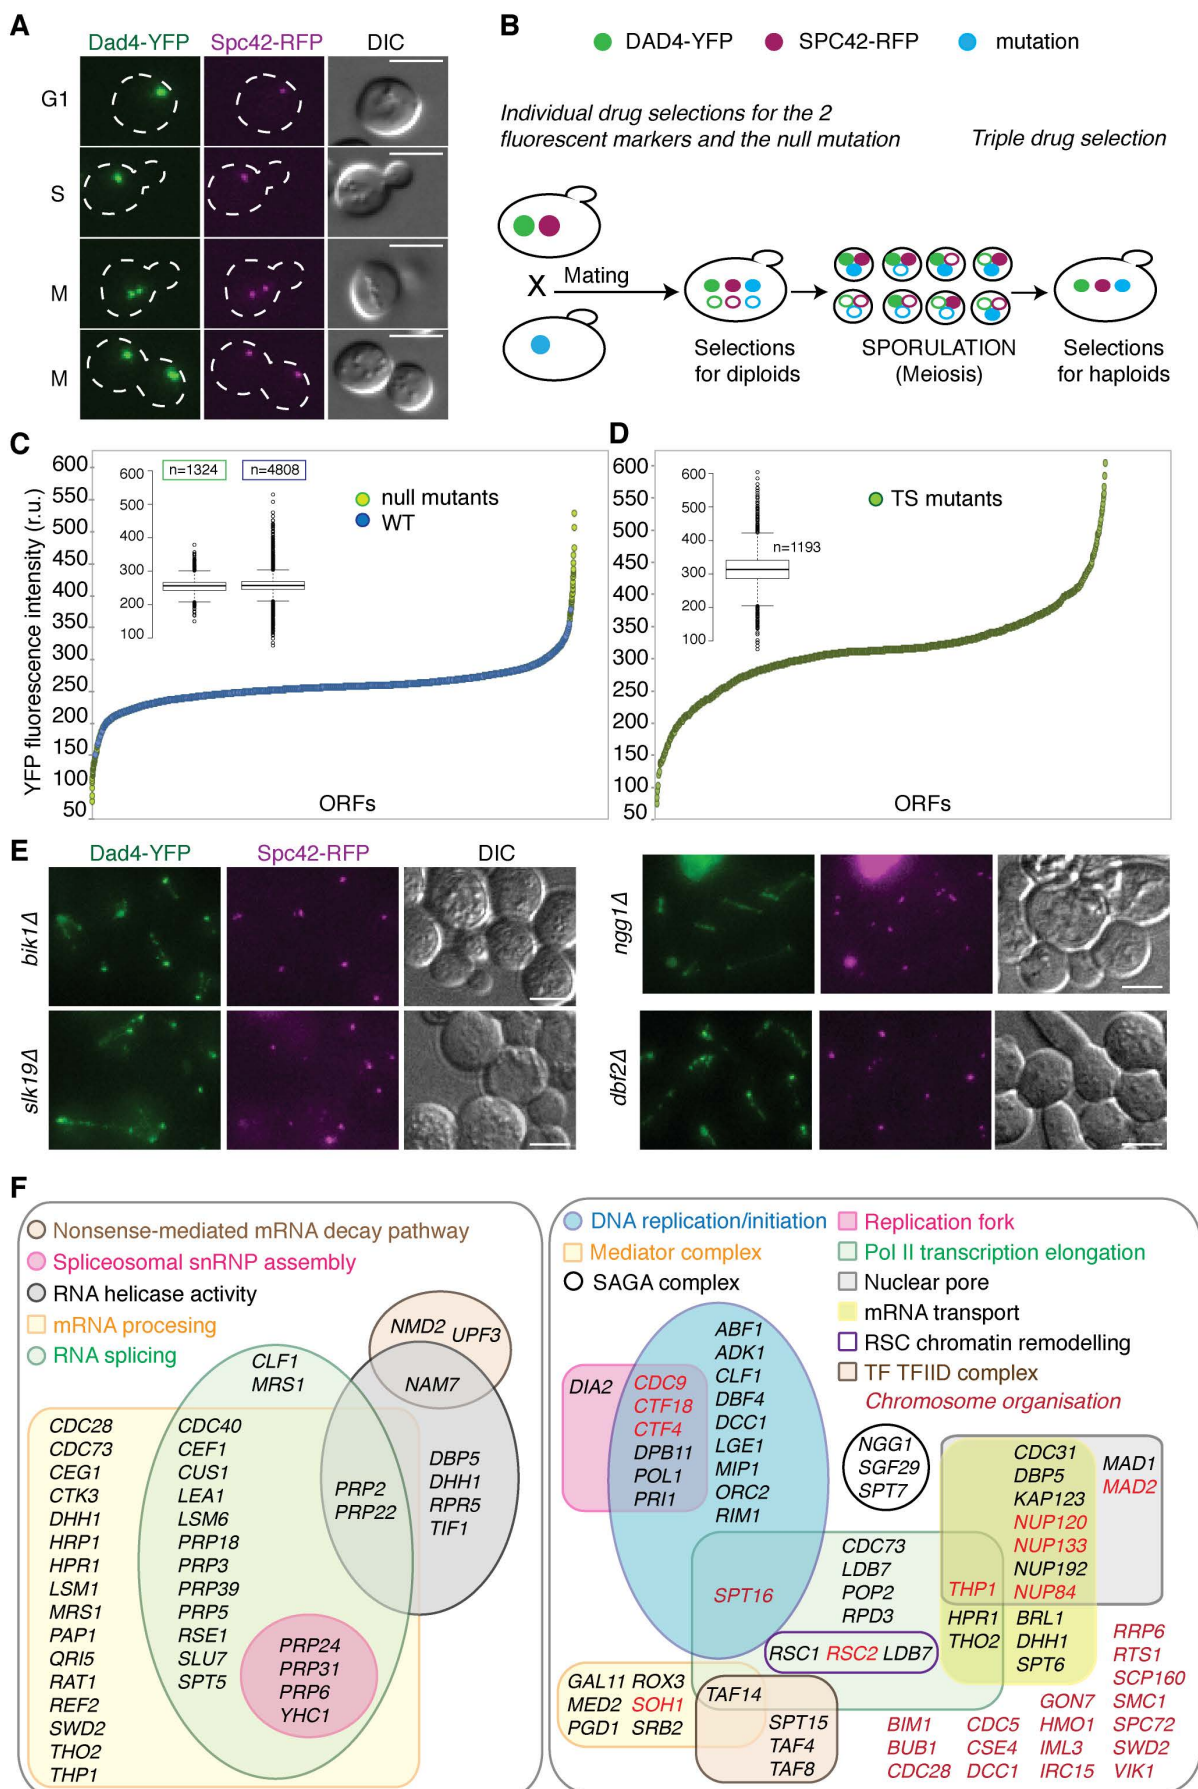

**Fig 2**

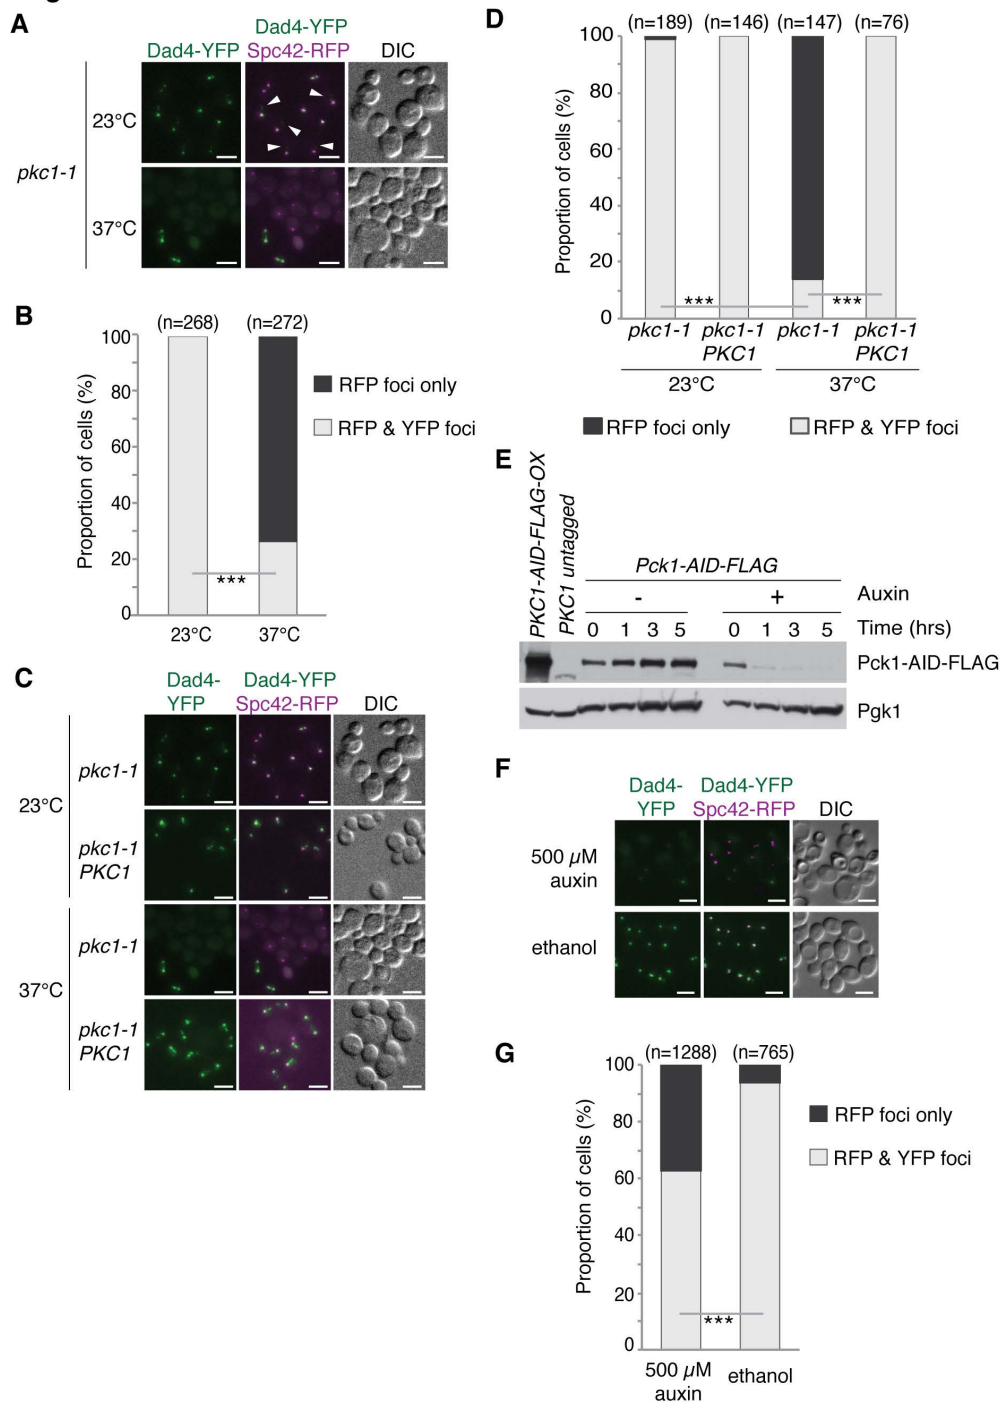

**Fig 3**

**A**

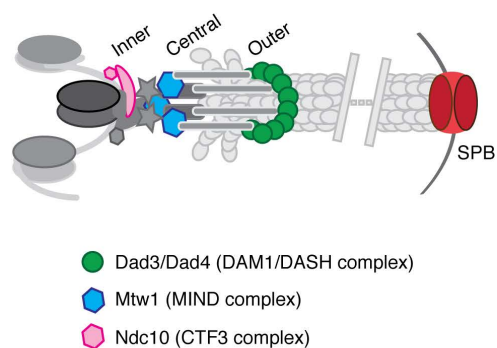

**B**

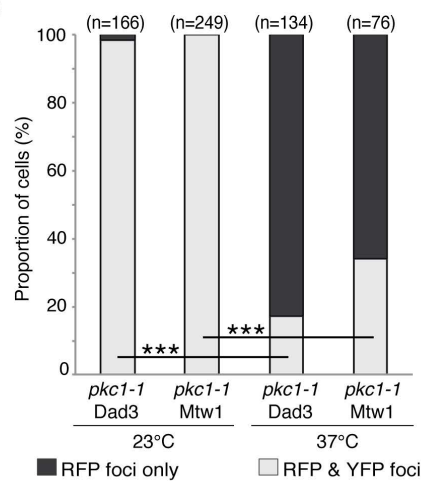

**C**

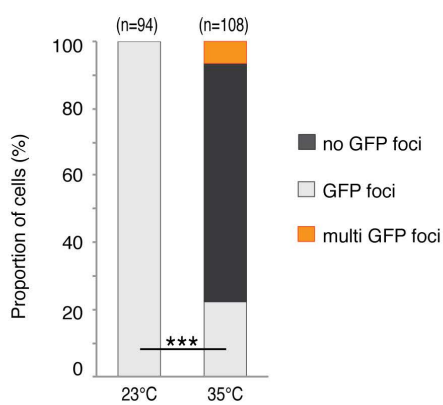

**D**

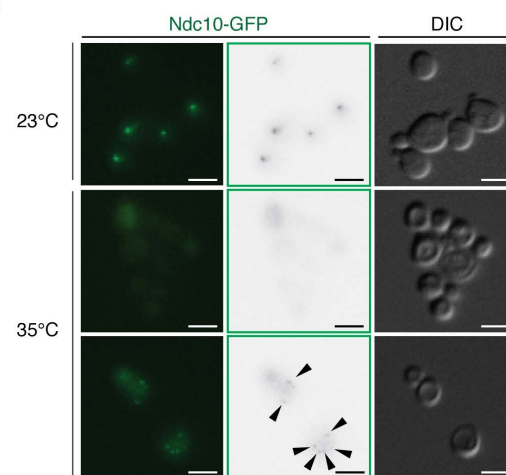

**E**

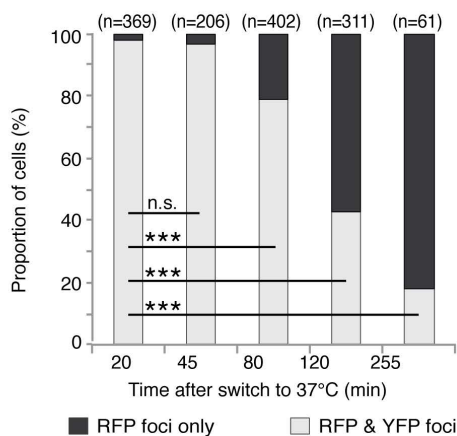

**F**

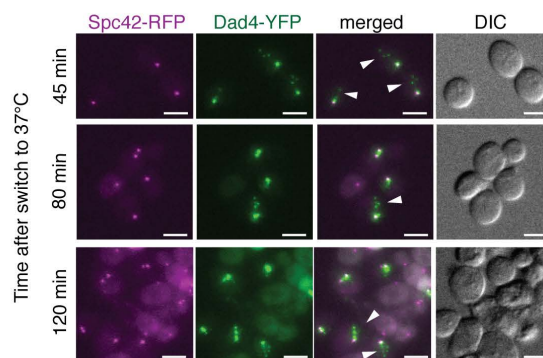

**Fig 4**

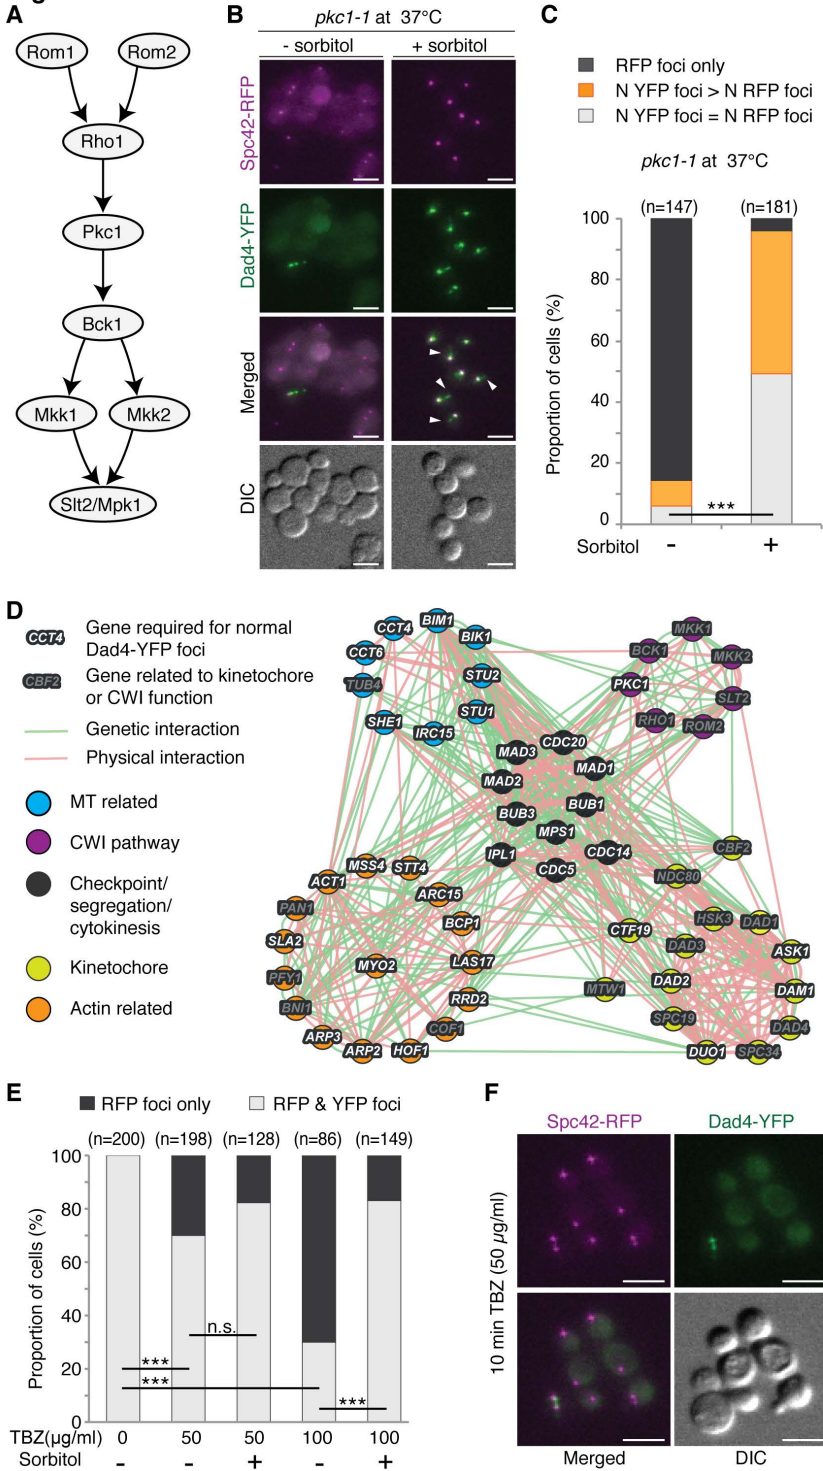

**Fig 5**

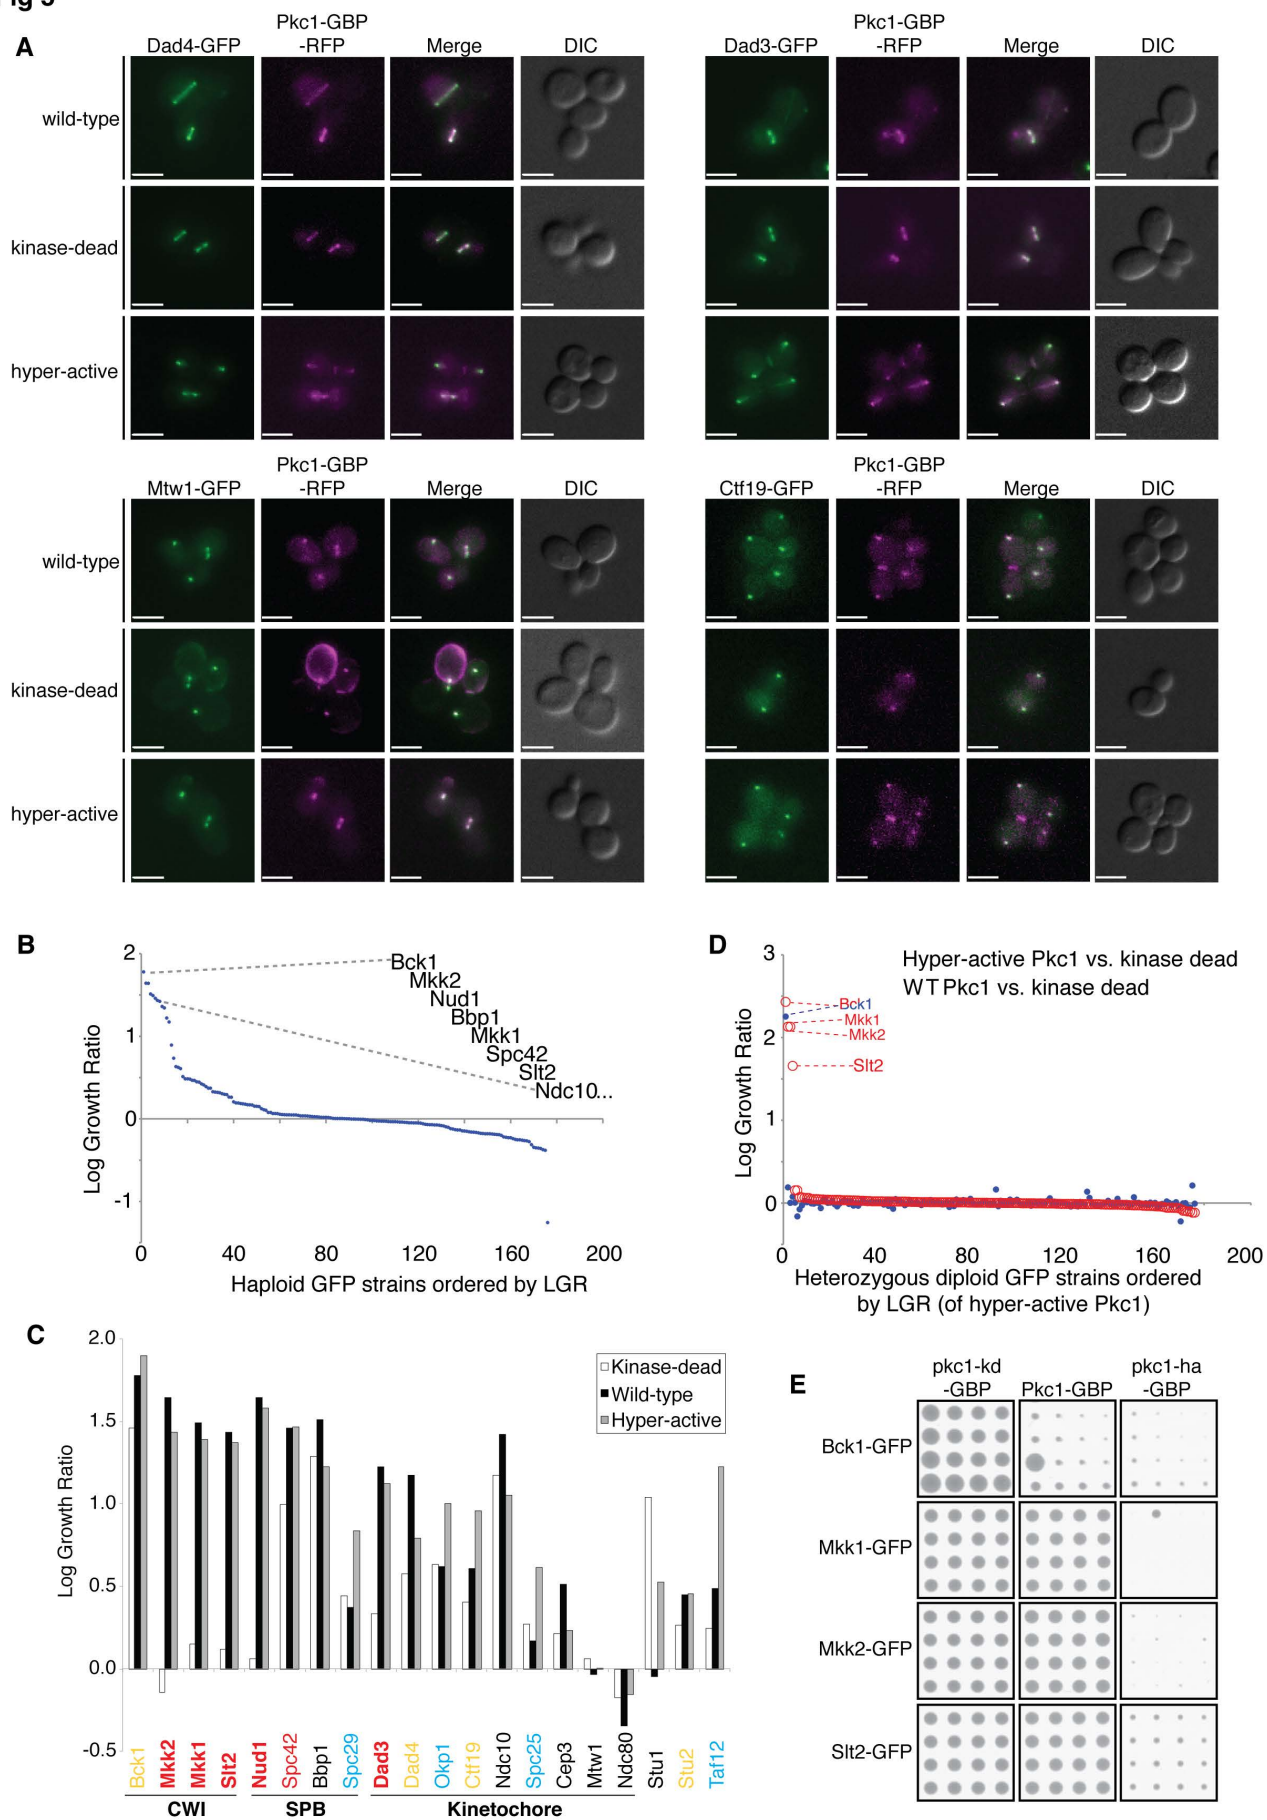

**Fig 6**

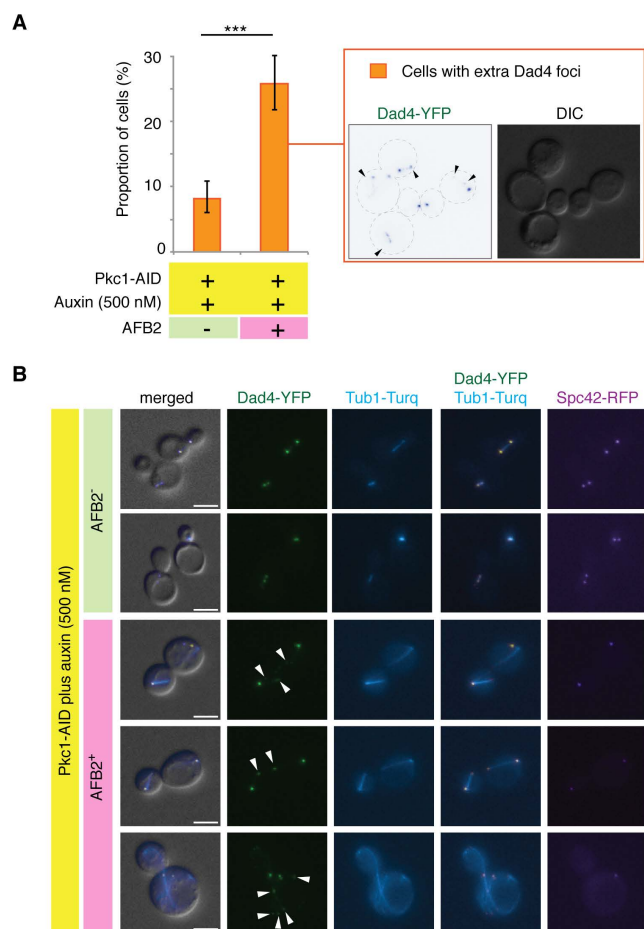

Source: https://www.biorxiv.org/content/biorxiv/early/2016/09/28/078196.full.pdf
